# Supplementary material
Source: publisher figshare collection journal article supplement (https://tandf.figshare.com/ndownloader/files/25946961)
Supplement: Supplementary file 1 [file 25946961]

## Sheet: Sheet1
Caption: Significant results of Kruskal-Wallis multiple comparison p-values adjusted with the Bonferroni method of each whislte parameter with the encounters of Delphinus delphis recorded on the Slope Region of South Western Atlantic Ocean
Whistle parameters	Comparison	Z	P.adj
Initial Frequency	CVIIb - CXa	3.52607	p<0.001
Final Frequency	CVIIb - CXa	3.29723	p<0.05
	CVIIIb - CXb	-3.26983	p<0.05
	CXa - CXb	-5.02245	p<0.001
	CXb - CXc	4.25842	p<0.001
Minimum Frequency	CVIIb - CVIIIb	3.48996	p<0.05
	CVIIb - CXa	5.65796	p<0.001
	CXa - CXb	-4.46323	p<0.001
	CVIIb - CXc	5.66899	p<0.001
	CXb - CXc	4.44294	p<0.001
Maximum Frequency	CVIIb - CXa	3.30707	p<0.05
	CVIIIb - CXa	3.64543	p<0.001
	CXa - CXb	-4.7788	p<0.001
	CXb - CXc	3.15114	p<0.05
Frequency Range	CVIIb - CVIIIb	-4.36786	p<0.001
	CVIIb - CXa	-3.2622	p<0.05
	CVIIb - CXb	-4.31768	p<0.001
	CVIIa - CXc	-3.80003	p<0.001
	CVIIb - CXc	-5.23601	p<0.001
Peak Frequency	CVIIb - Cxa	3.20992	p<0.05
	CVIIIb - Cxa	3.43692	p<0.05
	CXa - CXb	-5.24189	p<0.001
	CXb - CXc	4.11988	p<0.001
Center Frequency	CVIIb - CXa	3.87014	p<0.001
	CVIIIb - CXa	3.37058	p<0.05
	CXa - CXb	-4.87362	p<0.001
	CVIIb - CXc	3.38843	p<0.05
	CXb - CXc	4.41266	p<0.001
Duration	CVIIa - CXc	-5.92042	p<0.001
	CVIIIb - CXc	-4.48741	p<0.001
Frequency Gradient	CVIIa - CVIIb	3.2697	p<0.05
	CVIIb - CVIIIb	-4.73101	p<0.001
	CVIIb - CXb	-4.06667	p<0.001
	CVIIb - CXc	-3.15672	p<0.05
